# Supplementary material for: Facile synthesis of bimetal Au–Ag nanoparticles in a Cu(i) boron imidazolate framework with mechanochromic properties
Source: Royal Society of Chemistry journal article supplement (doi:10.1039/c4cc09041a), 2014-11-25
Supplement: c4cc09041a1.pdf [file c4cc09041a1.pdf]

*Electronic Supplementary Information (ESI) for*

**Facile Synthesis of Bimetal Au-Ag Nanoparticles in Cu(I)  
Boron Imidazolate Framework with Mechanochromic  
Property**

Tian Wen, De-Xiang Zhang, Juan Liu, Hai-Xia Zhang, Jian Zhang\*

*State Key Laboratory of Structural Chemistry, Fujian Institute of Research on the  
Structure of Matter, the Chinese Academy of Sciences, Fuzhou, Fujian 350002, P. R.*

*China. E-mail: zhj@fjirsm.ac.cn*

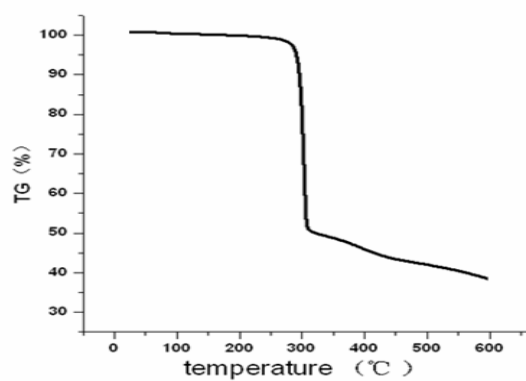

**Figure S1.** Thermogravimetric analysis of **BIF-38** sample.

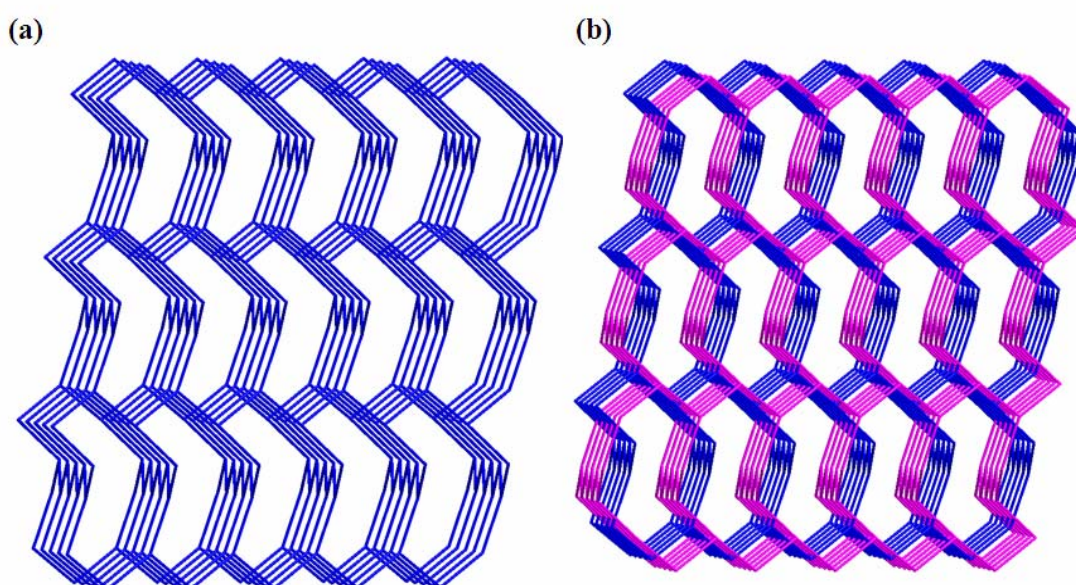

**Figure S2.** (a) Representations of the *ths* net in **BIF-38**; (b) view of the two-fold interpenetrated *ths* net of **BIF-38**.

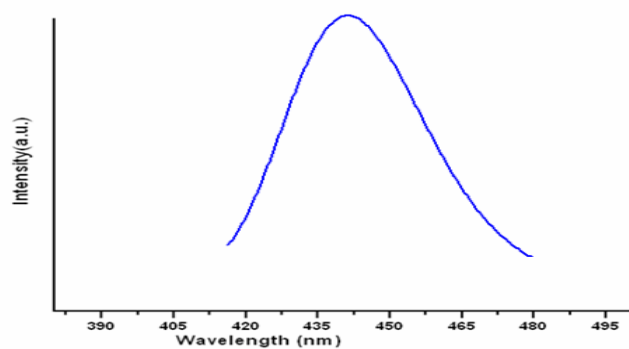

**Figure S3.** The solid-state emission spectra ( $\lambda_{\text{ex}} = 335 \text{ nm}$ ) for  $\text{KBH}(\text{im})_3$ .

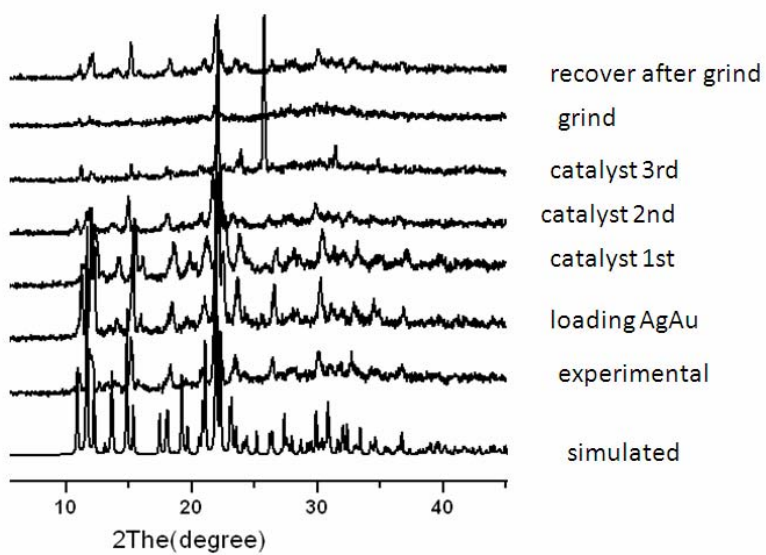

**Figure S4.** The PXRD patterns of **BIF-38** under different conditions.

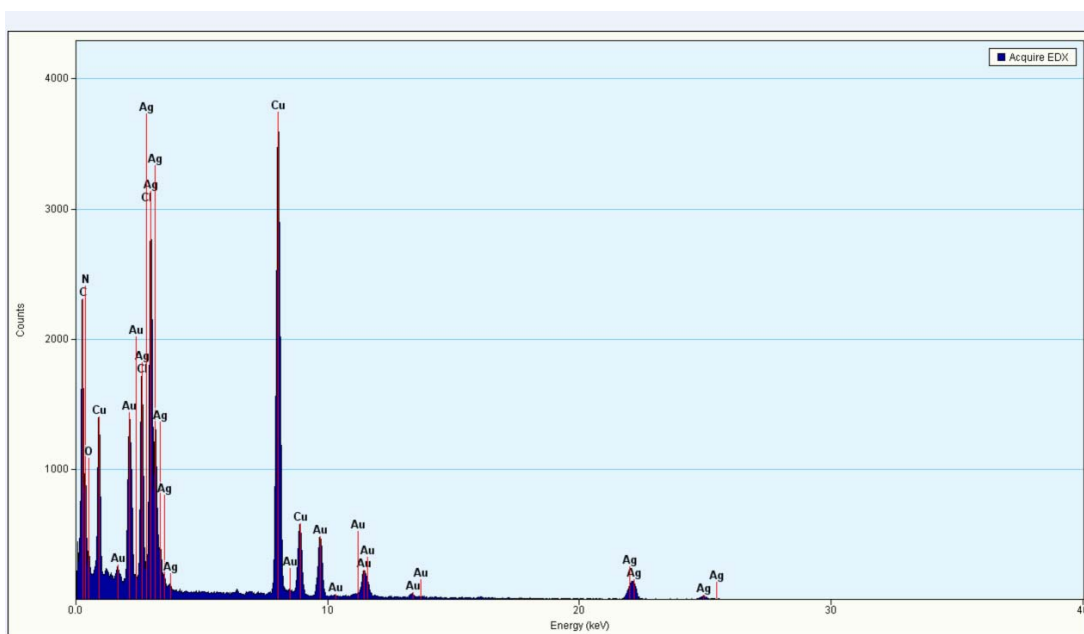

**Fig. S5** EDX of AuAg@BIF-38 .

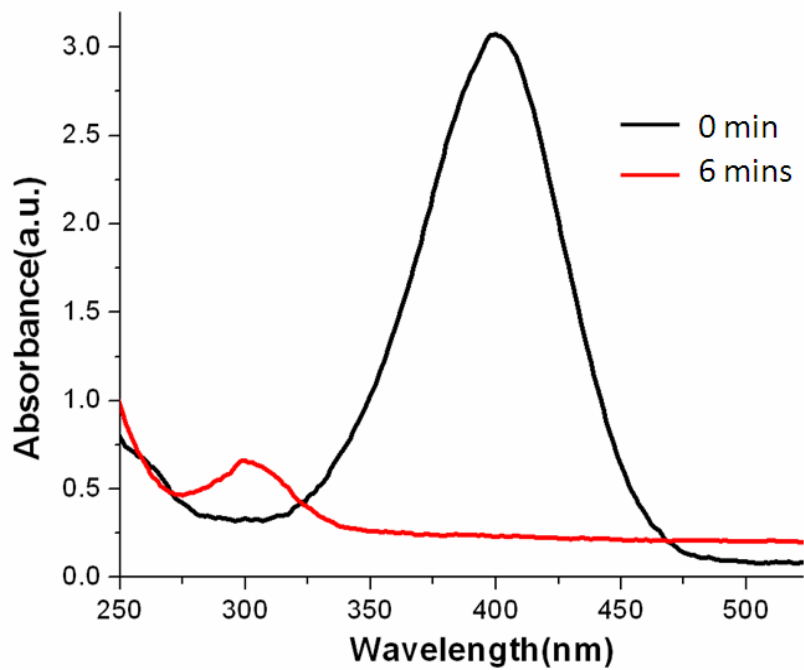

**Figure S6.** UV-vis spectra showing reduction of 4-NP over **AuAg@BIF-38**.

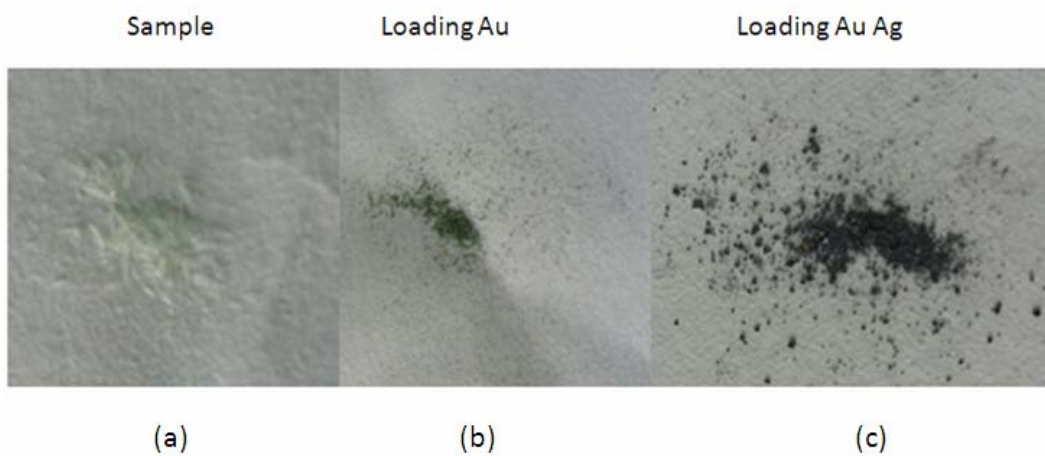

**Figure S7.** (a) optical image of **BIF-38**; (b) optical image of **Au@BIF-38**; (c) optical images for **AuAg@BIF-38** crystals.

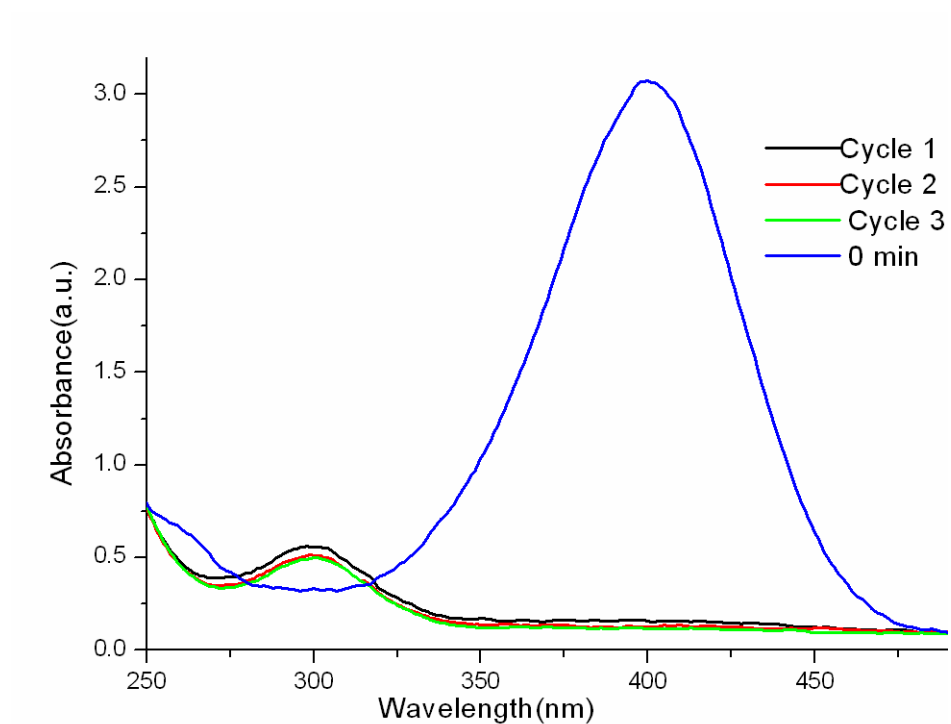

**Figure S8.** Recycling test on reduction of 4-NP over **AuAg@BIF-38**.

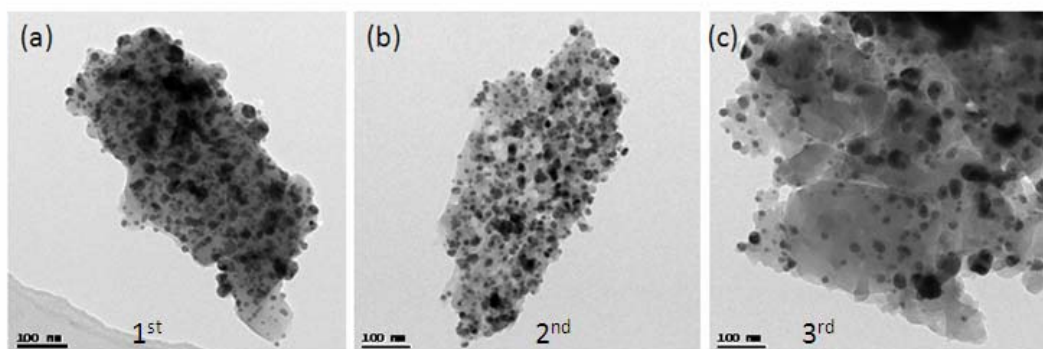

**Figure S9.** TEM images of **AuAg@BIF-38** after three times catalytic reaction.
